# Supplementary material for: Calaxin stabilizes the docking of outer arm dyneins onto ciliary doublet microtubule in vertebrates
Source: eLife journal article supplement (doi:10.7554/elife.84860), 2023-04-14
Supplement: fig1-data1 [file Figure 1-source data 1.xlsx]

## Sheet: Sheet1
KV_cilia_motility_pattern
	WT	armc4-/-		calaxin-/-	(calaxin-/- data is derived from Sasaki et al., 2019, displayed for comparison at a glance)
n(embryo)	6	5		12
n(cilia)	59	100		72
motility_pattern	n(cilia)
	WT	armc4-/-		calaxin-/-	(calaxin-/- data is derived from Sasaki et al., 2019, displayed for comparison at a glance)
rotating	58	32		25
irregular	1	45		47
immotile	0	23		0
motility_pattern	%(cilia)
	WT	armc4-/-		calaxin-/-	(calaxin-/- data is derived from Sasaki et al., 2019, displayed for comparison at a glance)
rotating	98.3051	32		34.7222
irregular	1.69492	45		65.2778
immotile	0	23		0
