# Supplementary material for: Calaxin stabilizes the docking of outer arm dyneins onto ciliary doublet microtubule in vertebrates
Source: eLife journal article supplement (doi:10.7554/elife.84860), 2023-04-14
Supplement: fig1-data2 [file Figure 1-source data 2.xlsx]

## Sheet: Sheet1
KV_cilia_rotation_frequency
	WT	armc4-/-		calaxin-/-	(calaxin-/- data is derived from Sasaki et al., 2019, displayed for comparison at a glance)
number of samples	58	32		25
raw data [Hz]	46.2185	24.7525		29.6736
	52.5164	27.1003		25.1572
	45.6432	12.9199		23.2558
	47.5162	16.3399		35.8056
	45.4545	24.0385		17.3913
	45.7516	17.9372		24.6154
	26.9663	19.7368		37.8788
	33.86	21.4797		26.6667
	47.5162	17.2414		25.7732
	48.7805	22.7273		32.4484
	31.8907	30.0926		22.6537
	32.7869	21.2264		39.801
	29.2793	19.8511		41.0023
	35.9551	18.5676		20.0893
	37.1179	28.6738		41.2844
	32.6087	29.2135		27.027
	39.0805	30.0926		31.7919
	32.3276	26.087		29.8851
	33.3333	22.8833		20.3488
	39.4191	26.1905		37.1287
	31.25	32.4826		14.4928
	39.5604	27.5229		41.4634
	31.6027	51.4541		31.5534
	26.57	27.5689		31.7848
	35.0109	28.7611		38.2353
	32.3326	52.0362
	27.8422	28.7611
	35.5556	27.3973
	32.0513	28.0374
	35.3201	27.7778
	37.037	32.2581
	31.5315	28.0778
	22.4439
	39.7351
	42.7928
	42.0561
	39.9113
	48.3461
	50.3282
	41.1255
	32.6797
	44.9438
	47.8261
	38.9016
	46.0526
	44.0529
	38.5488
	40.1691
	43.6681
	46.2555
	39.9061
	42.735
	53.3049
	46.875
	40.9091
	45.2586
	41.3943
	47.1092
Welch's t test	data1	data2	p-value
	WT	armc4-/-	5.47242e-10	**
Tukey-Kramer test	data1	data2	p-value
	WT	armc4-/-	1.71845e-11	**
	WT	calaxin-/-	2.17892e-06	**
	armc4-/-	calaxin-/-	0.228828	NS
