# Supplementary material for: Calaxin stabilizes the docking of outer arm dyneins onto ciliary doublet microtubule in vertebrates
Source: eLife journal article supplement (doi:10.7554/elife.84860), 2023-04-14
Supplement: fig1-data3 [file Figure 1-source data 3.xlsx]

## Sheet: Sheet1
embryo_heart_looping
		WT	armc4-/-		calaxin-/-	(calaxin-/- data is derived from Sasaki et al., 2019, displayed for comparison at a glance)
n(embryo)		110	63
heart_looping		n(embryo)
		WT	armc4-/-		calaxin-/-	(calaxin-/- data is derived from Sasaki et al., 2019, displayed for comparison at a glance)
normal		104	32		47
abnormal	reversed	6	24		61
	no loop	0	7		6
heart_looping		%(embryo)
		WT	armc4-/-		calaxin-/-	(calaxin-/- data is derived from Sasaki et al., 2019, displayed for comparison at a glance)
normal		94.5455	50.7937		41.2281
abnormal	reversed	5.45455	38.0952		53.5088
	no loop	0	11.1111		5.26316
