# Supplementary material for: Calaxin stabilizes the docking of outer arm dyneins onto ciliary doublet microtubule in vertebrates
Source: eLife journal article supplement (doi:10.7554/elife.84860), 2023-04-14
Supplement: fig2-data2 [file Figure 2-source data 2.xlsx]

## Sheet: Sheet1
CASA_VAP
	WT	calaxin-/-	armc4-/-
number of replicates	16	16	16
raw data [µm/s]	62.7602	79.4409	50.4601
	63.7786	76.7704	48.8098
	66.2215	74.4405	41.4442
	67.0279	72.8875	42.3829
	55.2374	74.3898	49.2496
	57.2804	75.5265	48.5883
	85.876	61.7251	47.2617
	85.911	67.4184	46.1332
	63.9781	75.6687	46.8102
	66.1767	80.2434	47.7836
	79.8898	88.8749	51.2568
	78.9697	76.4305	51.3292
	72.0739	74.9597	50.7318
	68.0728	87.47	48.3188
	74.768	83.6484	47.8523
	72.5391	81.0405	47.63
Tukey-Kramer test	data1	data2	p-value
	WT	calaxin-/-	0.0166759	*
	WT	armc4-/-	1.82927e-11	**
	calaxin-/-	armc4-/-	2.50133e-13	**
