# Supplementary material for: Calaxin stabilizes the docking of outer arm dyneins onto ciliary doublet microtubule in vertebrates
Source: eLife journal article supplement (doi:10.7554/elife.84860), 2023-04-14
Supplement: fig2-data3 [file Figure 2-source data 3.xlsx]

## Sheet: Sheet1
CASA_BCF
	WT	calaxin-/-	armc4-/-
number of replicates	16	16	16
raw data [Hz]	83.5771	64.8941	59.771
	83.8654	70.497	59.8376
	85.8453	63.1871	62.4948
	80.197	71.7194	57.6101
	84.2792	68.5485	60.312
	80.287	70.9353	51.8708
	78.2632	70.1932	62.1601
	79.2626	67.0628	64.1564
	82.197	69.1877	57.6082
	76.2373	68.7591	62.6164
	71.7641	78.477	61.704
	77.4964	78.6559	62.4346
	75.7737	64.3867	42.2606
	79.2491	73.3819	50.227
	79.1155	58.3364	56.3776
	76.1408	63.0633	59.7221
Tukey-Kramer test	data1	data2	p-value
	WT	calaxin-/-	8.02066e-07	**
	WT	armc4-/-	2.50688e-13	**
	calaxin-/-	armc4-/-	1.03656e-06	**
